# Supplementary material for: Impact of 18F-FET PET on Target Volume Definition and Tumor Progression of Recurrent High Grade Glioma Treated with Carbon-Ion Radiotherapy
Source: PubMed Central journal article supplement (PMC5940831; doi:10.1038/s41598-018-25350-7), 2018-05-08
Supplement: 41598_2018_25350_MOESM1_ESM.pdf [file 41598_2018_25350_MOESM1_ESM.pdf]

# Impact of $^{18}\text{F}$ -FET PET on Target Volume Definition and Tumor Progression of Recurrent High Grade Glioma Treated with Carbon-Ion Radiotherapy

Charlotte Debus<sup>1-4,#</sup>, Maria Waltenberger<sup>1-4</sup>, Ralf Floca<sup>3,5</sup>, Ali Afshar-Oromieh<sup>6</sup>,  
Nina Bougati<sup>3,4</sup>, Sebastian Adeberg<sup>3,4</sup>, Sabine Heiland<sup>7</sup>, Martin Bendszus<sup>7</sup>, Wolfgang Wick<sup>1,8</sup>, Stefan  
Rieken<sup>3,4</sup>, Uwe Haberkorn<sup>6,9</sup>, Jürgen Debus<sup>1-4</sup>, Maximilian Knoll<sup>1-4</sup>, and Amir Abdollahi<sup>1-4,#</sup>

<sup>1</sup>German Cancer Consortium (DKTK), Heidelberg, Germany

<sup>2</sup>Translational Radiation Oncology, National Center for Tumor Diseases (NCT), German Cancer Research Center (DKFZ), Heidelberg, Germany

<sup>3</sup>Division of Molecular and Translational Radiation Oncology, Heidelberg Institute of Radiation Oncology (HIRO), National Center for Radiation Research in Oncology (NCRO), Germany

<sup>4</sup>Heidelberg Ion-Beam Therapy Center (HIT), Department of Radiation Oncology, Heidelberg University Hospital, Germany

<sup>5</sup>Software development for Integrated Diagnostics and Therapy, German Cancer Research Center DKFZ), Heidelberg, Germany

<sup>6</sup>Department of Nuclear Medicine, Heidelberg University Hospital, Germany

<sup>7</sup>Department of Neuroradiology, Heidelberg University Hospital, Germany

<sup>8</sup>Department of Neurology, Heidelberg University Hospital and Clinical Cooperation Unit Neurooncology, National Center for Tumor Diseases (NCT), German Cancer Research Center (DKFZ), Heidelberg, Germany,

<sup>9</sup>Clinical Cooperation Unit Nuclear Medicine, German Cancer Research Center DKFZ), Heidelberg, Germany

## Supplements

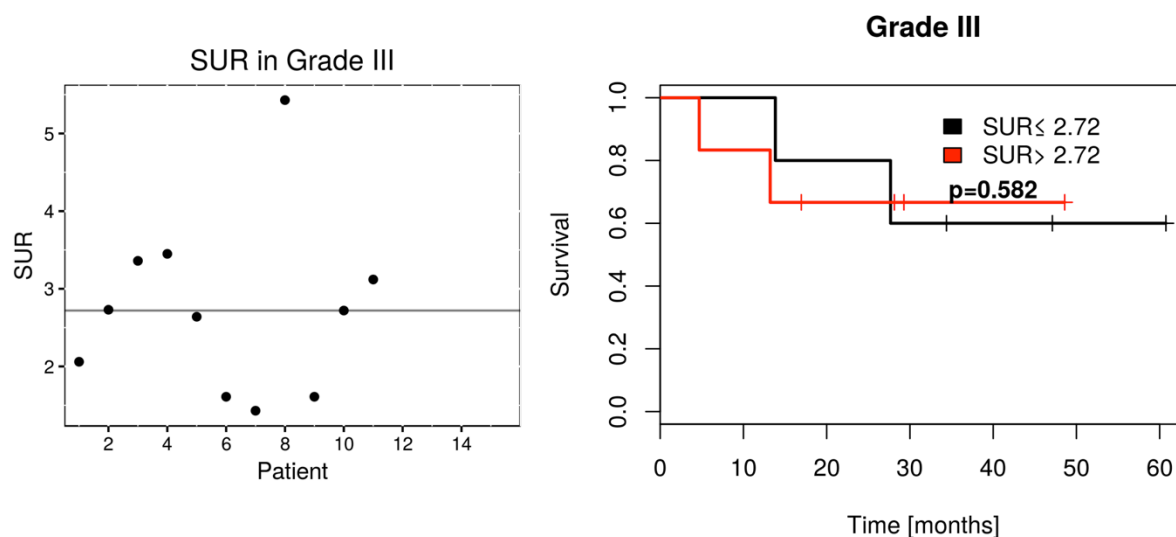

**Supplementary figure 1:** Relation between SUR and Survival in grade III glioma. The median value of SUR=2.72 separated two groups. However, the differences between the two groups were statistically not significant (log-rank,  $p=0.582$ ). Overall, the median survival was not reached in both groups and the number of patient was limited for a decisive conclusion.

| Correlation with   |          | All  | Grade III | Grade IV |
|--------------------|----------|------|-----------|----------|
| SUV <sub>max</sub> | Pearson  | 0.31 | 0.22      | 0.43     |
|                    | Spearman | 0.31 | 0.2       | 0.42     |
| SUR                | Pearson  | 0.21 | 0.11      | 0.35     |
|                    | Spearman | 0.29 | 0.05      | 0.56     |

**Supplementary table 1:** Correlation coefficients R for relationship between SUV<sub>max</sub>/SUR with the maximum conformity index CI<sub>max</sub> (c.f. Fig. 3c)

## Sensitivity analysis & power calculation:

SUR was slightly but not significantly higher in grade IV glioma compared to grade III glioma.

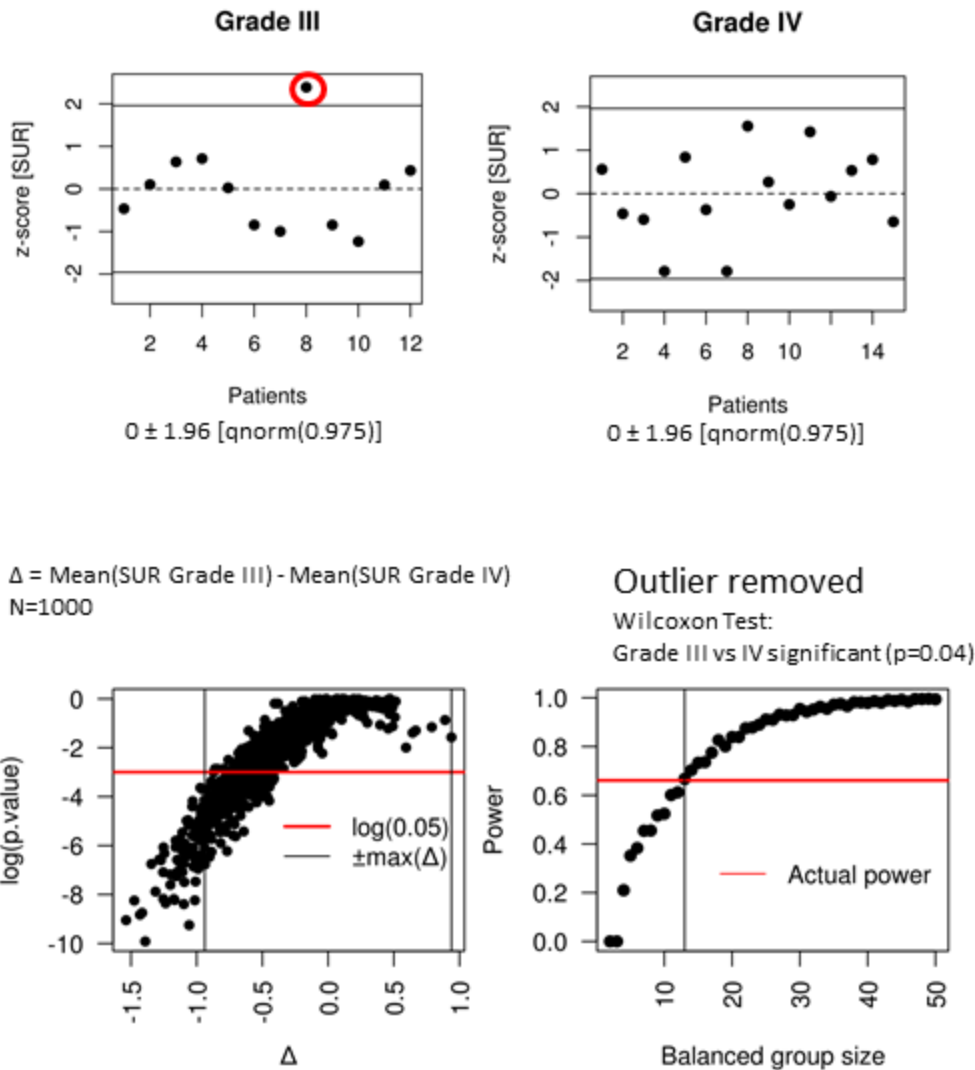

→ SUR Grade III < SUR Grade IV

**Supplementary figure 2:** Sensitivity analysis of the SUR difference between grade III and IV tumors. Potential outliers in SUR measurements were identified by examination of standardized values (z-transformation). Calculation of effect differences between groups and the corresponding Wilcoxon p-value (two-sided) for 1000 bootstrapped datasets (including the outlier). Post-ho power calculation using the observed measurements (outlier removed) for a balance group design.

## Power calculation

In grade IV tumors, the median value of SUR=2.92 clearly separated patients into two prognostic subgroups as shown in KM-plot.

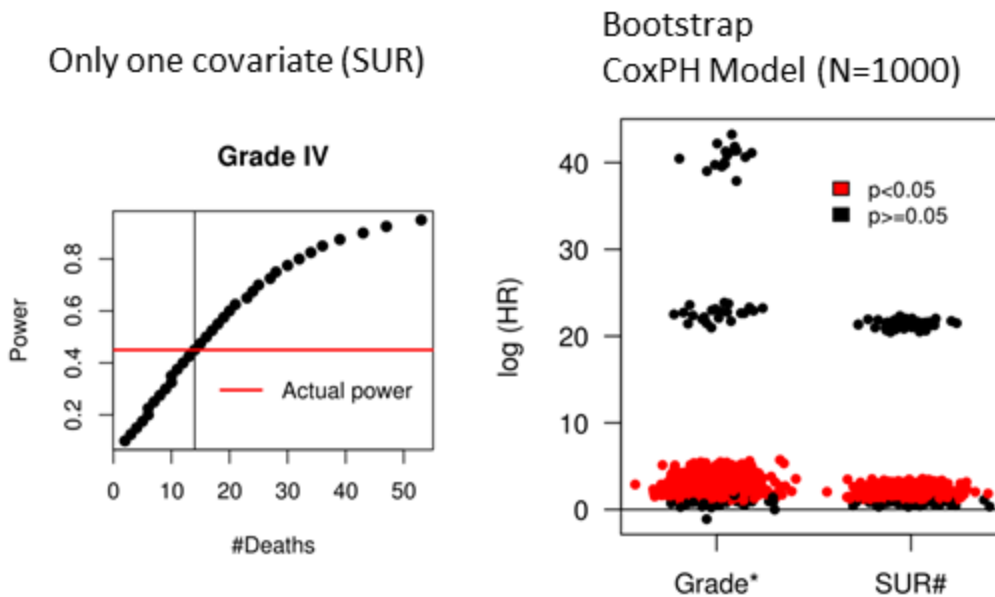

Multivariate: Grade + SUR

|        | Hazard Ratio | 95% CI     | p-value |
|--------|--------------|------------|---------|
| Grade* | 9.36         | 2.85-30.76 | <0.001  |
| SUR#   | 3.22         | 1.16-8.95  | 0.025   |

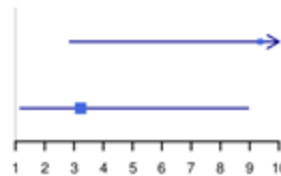

Two covariates: Grade + SUR

Required number of deaths: 34

\* Grade IV vs III  
# high vs low

**Supplementary figure 3:** Multivariate survival analysis (tumor grade and SUR) for the observed and bootstrapped data as well as power and sample size calculation using estimates derived from the presented data
